# Supplementary material for: Thoroughly Remold the Localization and Signaling Pathway of TLR22
Source: PubMed Central journal article supplement (PMC6978911; doi:10.3389/fimmu.2019.03003), 2020-01-17
Supplement: Image_1.pdf [file Image_1.pdf]

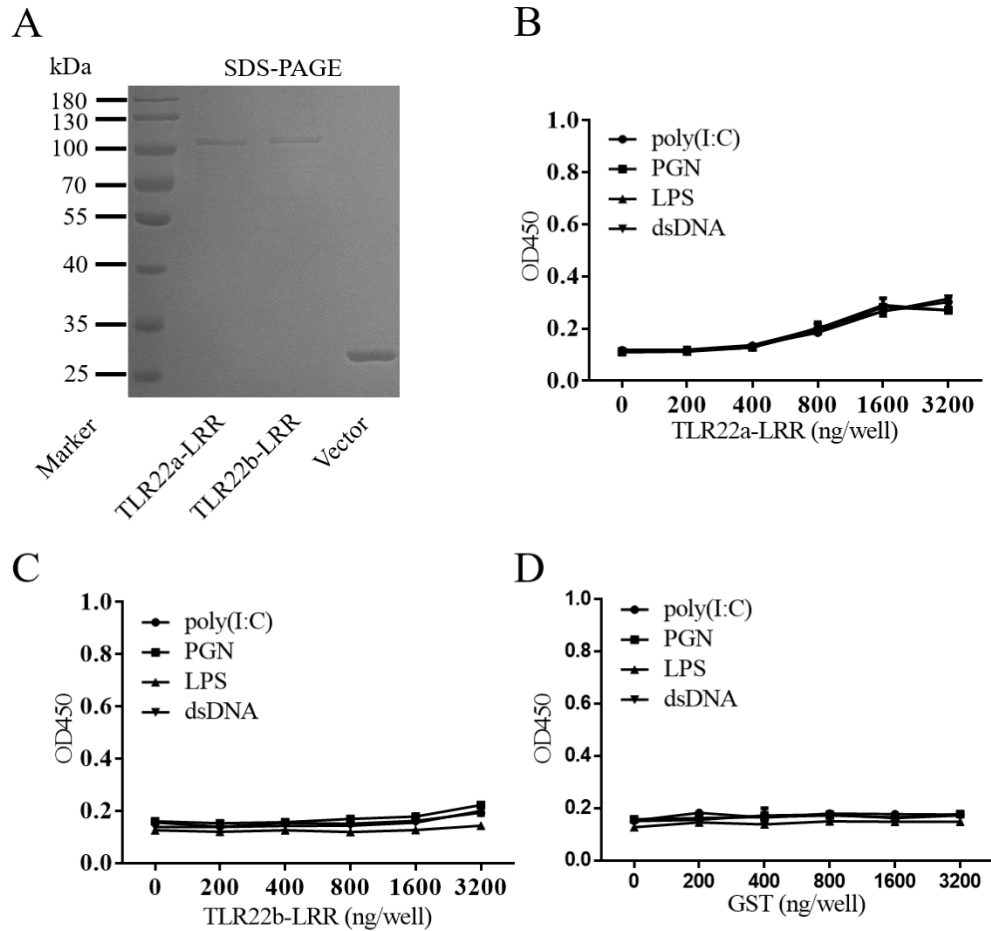

**Supplementary Figure 1** The interaction between CiTLR22a-LRR, CiTLR22b-LRR and PAMPs were not detectable *in vitro* (A) Purified CiTLR22a-LRR and CiTLR22b-LRR recombinant proteins were analyzed by SDS-PAGE. (B-D) The binding abilities between CiTLR22a-LRR, CiTLR22b-LRR, GST and different PAMPs were analyzed by ELISA at pH 7.4. The results are representative of the mean  $\pm$  SD (n=4).
